# Supplementary material
Source: PubMed Central journal article supplement (PMC1569195)
Supplement: pnas_0604661103_1.pdf [file pnas_0604661103_1.pdf]

|                       |     |                                                       |     |
|-----------------------|-----|-------------------------------------------------------|-----|
| Human PINK1<br>CG4523 | 1   | MAVRQALGRGLQLGRALLRFTG-----KPGRAYGLGRPGPA             | 37  |
|                       | 1   | MSVRLLTVRLIKHGRIYILRSYCKRDIHANILDQNQLKTRSKRGFPLPSTA   | 50  |
|                       |     | * ** * . . * * * . . * * * *                          |     |
| Human PINK1<br>CG4523 | 38  | AGCVRGE-----RPGWAAGPGAEP RR-----VGLGLP                | 64  |
|                       | 51  | ANVLRTPPQQA AKSVVNVVPTINS P SGSPFN GSGSSPTSSSGIFRVGQH | 100 |
|                       |     | * . * * * * * * *                                     |     |
| Human PINK1<br>CG4523 | 65  | NRLRFFRQSVAGLAARLQRQFVVRA----WGCAGPCGRAVFLAFGLGLG     | 109 |
|                       | 101 | ARKLFIDNILSRVTTTYS EDLRQRATRKLFFGDSAPFFALIGVSLASGSG   | 150 |
|                       |     | * * . . . . * * * * . . * *                           |     |
| Human PINK1<br>CG4523 | 110 | LIEEKQAESRRAVSACQEIQAI FTQKSKPG-PDPLDTRRLQGFRL E EYLI | 158 |
|                       | 151 | VLS-KEDE--LEGVCWEIREAASRLQNAWNHDEISDTLDSKFTID DLEI    | 196 |
|                       |     | . . * . * * * * . . * . * . . . *                     |     |
| Human PINK1<br>CG4523 | 159 | GQSIGKGC SAAVYEATMP----TLPQNLEVTKSTGLLPGRGPG-----     | 197 |
|                       | 197 | GPPIAKGCAAVVYAADF KKDVASD GASLHTDAQPQATPAFAPNSWSTHEM  | 246 |
|                       |     | * * * * * * * * * * * *                               |     |
| Human PINK1<br>CG4523 | 198 | -----TSAP-----GE-----                                 | 203 |
|                       | 247 | MSPLQNMSRFVHNFGGSVDNVFHY SQPSAASDFVGAQSREQDQRHHEQQQ   | 296 |
|                       |     | * * *                                                 |     |
| Human PINK1<br>CG4523 | 204 | --GQER-----APGAPAF-----PLAIKMMWNISAGS                 | 228 |
|                       | 297 | HQNQEQQEQHQNQEPSSSAFNVTSPANSNINSSVDSYPLALKMMFN YDIQS  | 346 |
|                       |     | . ** . * . ** * * * * * *                             |     |
| Human PINK1<br>CG4523 | 229 | SSEAILNTMSQELVPASRVALAGEYGA VTYRKS KRGPQLAPHPNIIRVL   | 278 |
|                       | 347 | NALSILRAMYKETV PARQRGMN-EAADEWERLLQNQTVHLPRHPNIVCMF   | 395 |
|                       |     | . ** * . * * * * . * * * * * .                        |     |
| Human PINK1<br>CG4523 | 279 | RAFTSSVPLLP GALVDYDVLPSRLHPEGLGHGRTLFLVMKNYPCTLRQY    | 328 |
|                       | 396 | GFFCDEV RNFPDGHLLYPVAQPQRINPQGYGRNMSLYLLMKRYDHS LRGL  | 445 |
|                       |     | * . * * * * * * * * * * * * * * *                     |     |
| Human PINK1<br>CG4523 | 329 | LCVNTPSPRLAAMLLQLLEGVDHLVQQGIAHRDLKSDN ILVELDPDGCP    | 378 |
|                       | 446 | LDSQDLSTRNRILL LAQMLEAVNHL SRHGV AHRDLKSDNVLIELQDDAAP | 495 |
|                       |     | * . * * * * * * * * * * * * * * *                     |     |
| Human PINK1<br>CG4523 | 379 | WLVIADFGCCLADESIGLQLPFSSWYVDRGGNGCLMAPEVSTARPGPRAV    | 428 |
|                       | 496 | VLVLSDFGCCLADKVHGLR LPYVSHDVKGGNAALMAPEIFNTMPGPFVAV   | 545 |
|                       |     | ** . * * * * * * * * * * * * * * *                    |     |
| Human PINK1<br>CG4523 | 429 | IDYSKADAWAVGAIAYEIFGLVNP FYG-----QGKAHLESRS--YQE      | 468 |
|                       | 546 | LNYGKADLWACGALAYEIFGNRNPFYSSSGMARERGERGEMTSLRNSDYRQ   | 595 |
|                       |     | . * * * * * * * * * * * * * * *                       |     |
| Human PINK1<br>CG4523 | 469 | AQLPALPESVPPDVRQLVRALLQREASKRPSARVAANVLHLSLWGEHILA    | 518 |
|                       | 596 | DQLPPMSDACPPLLQQLVYNI LNPNPSKRVS PDIAANVVQLFLWAPSNWL  | 645 |
|                       |     | ** * . . * * * * * * * * * * * * *                    |     |
| Human PINK1<br>CG4523 | 519 | LKNLKLD--KMVGWLLQQAATLLANR-----LTEKCC--VETKMKML       | 557 |
|                       | 646 | KAGGMPNSPEILQWLLSLTTKIMCEGRPQMGAGLMPVASCGNRRAYVEYL    | 695 |
|                       |     | . * * * * * * * * * * * * * * *                       |     |
| Human PINK1<br>CG4523 | 558 | FLANLECETLCQAALLCSWRAAL                               | 581 |
|                       | 696 | LICSFLARARLRRIRGALNWIQNVVA                            | 721 |
|                       |     | . . . . * .                                           |     |
