# Supplementary material
Source: PubMed Central journal article supplement (PMC1569195)

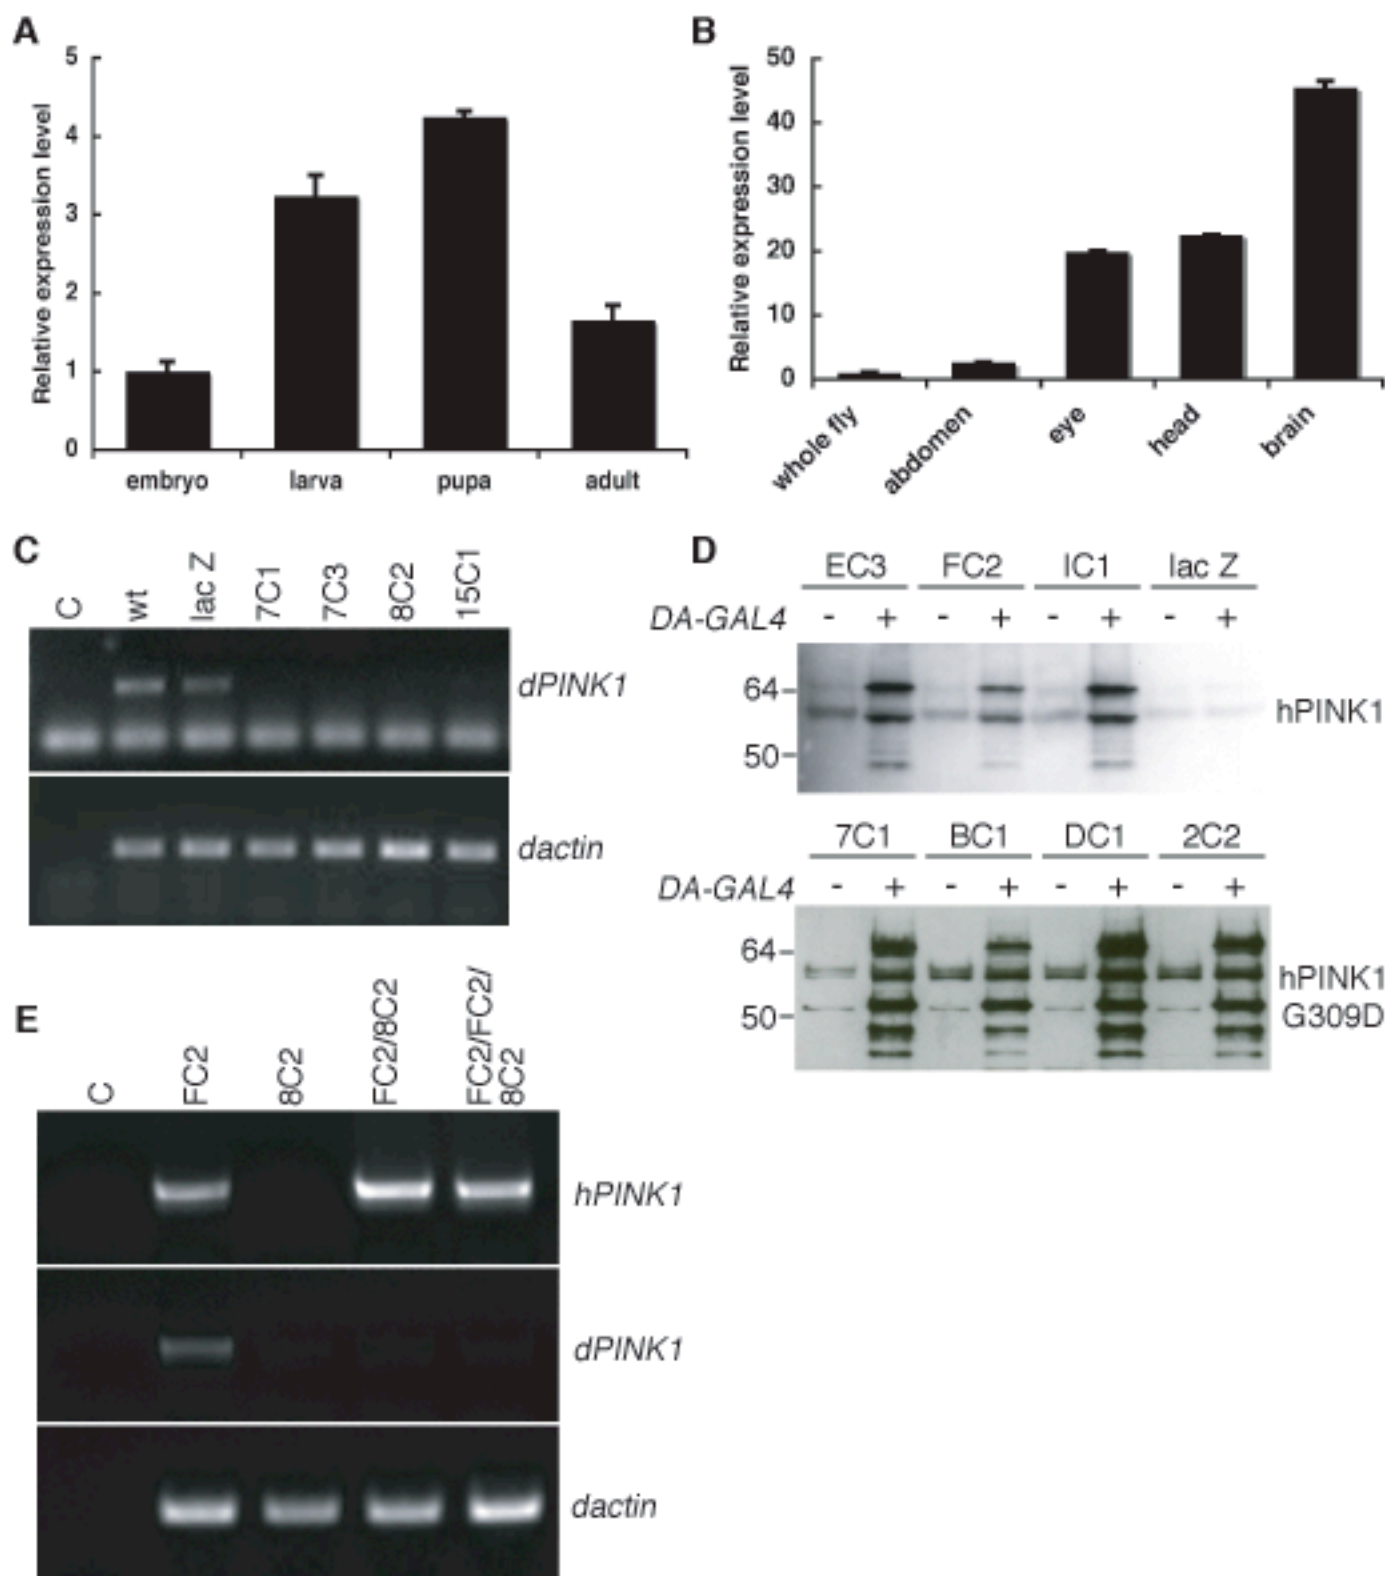

Supplement: pnas_0604661103_2.pdf [file pnas_0604661103_2.pdf]

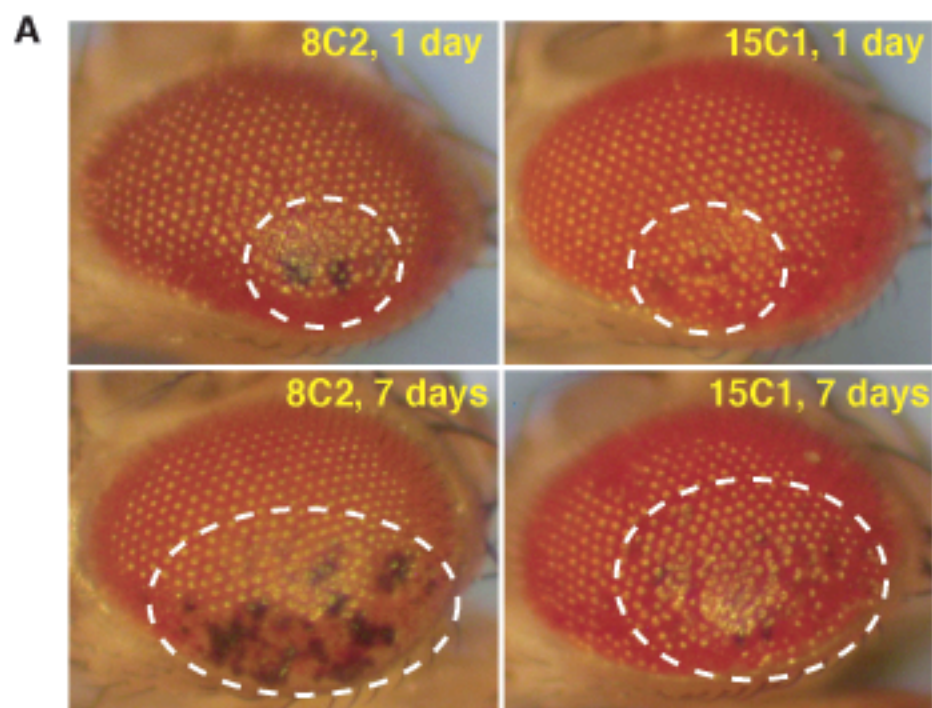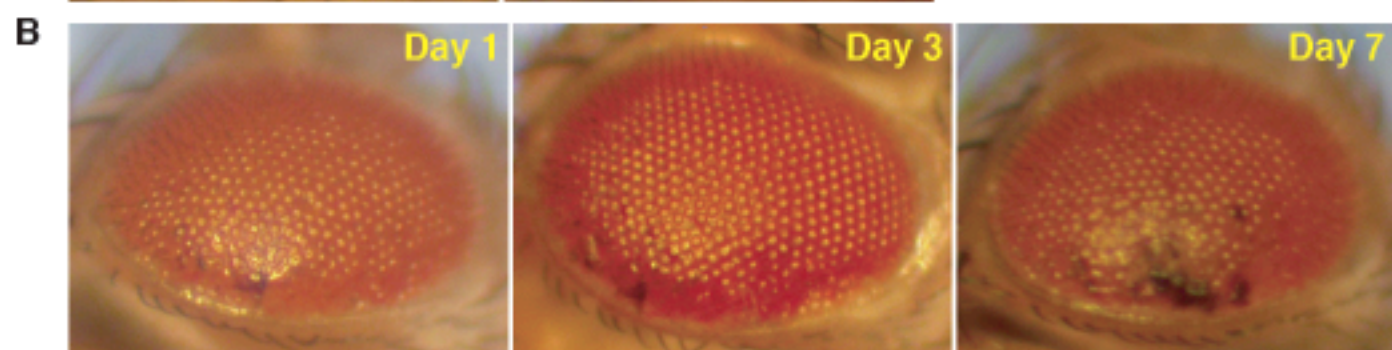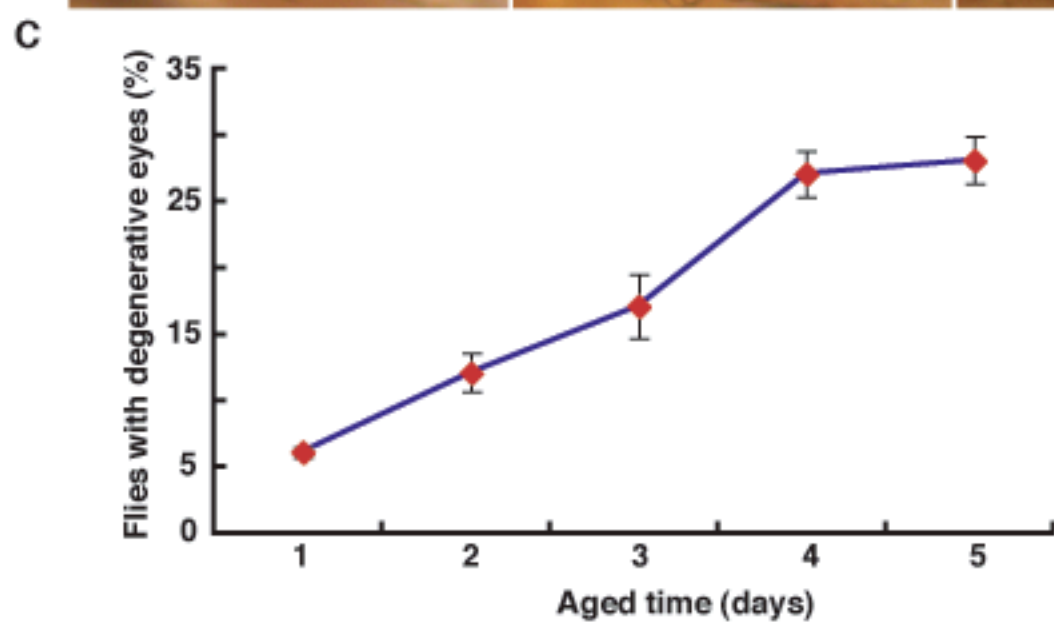

Supplement: pnas_0604661103_3.pdf [file pnas_0604661103_3.pdf]

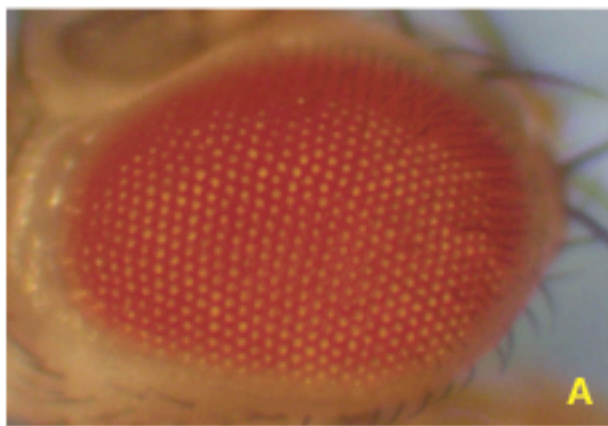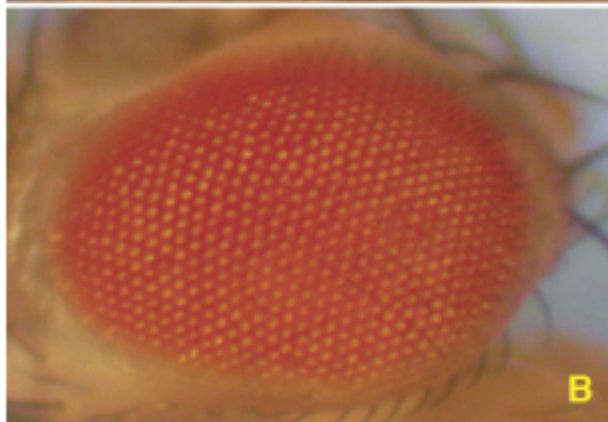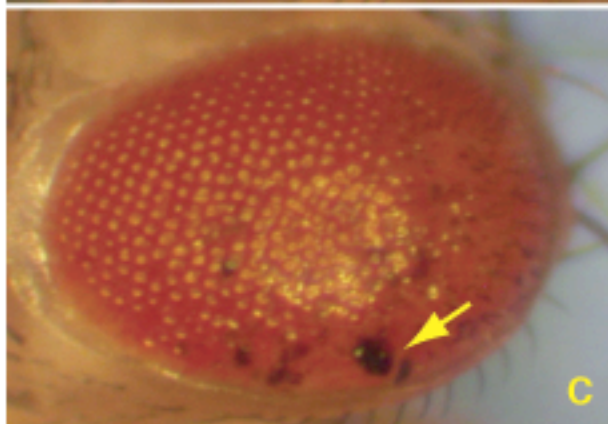

Supplement: pnas_0604661103_4.pdf [file pnas_0604661103_4.pdf]

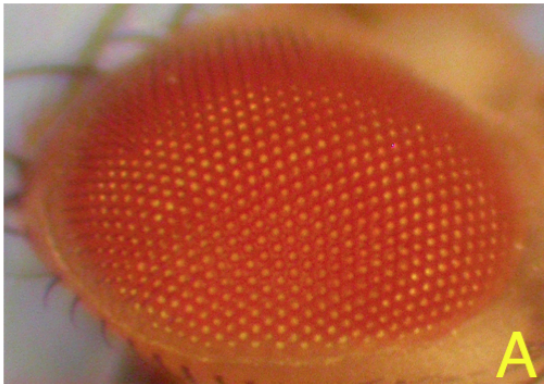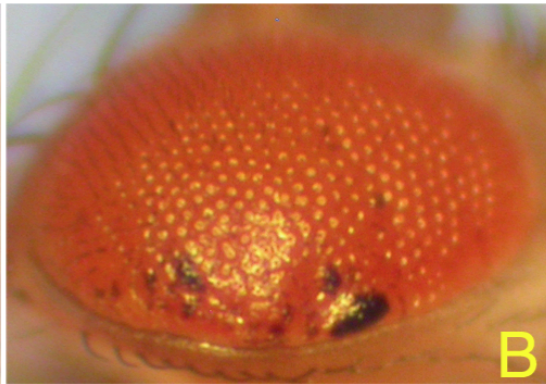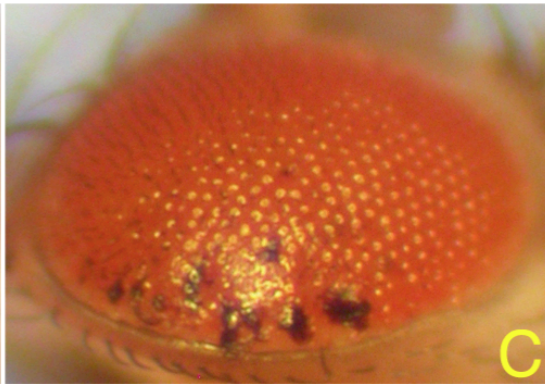

Supplement: pnas_0604661103_5.pdf [file pnas_0604661103_5.pdf]

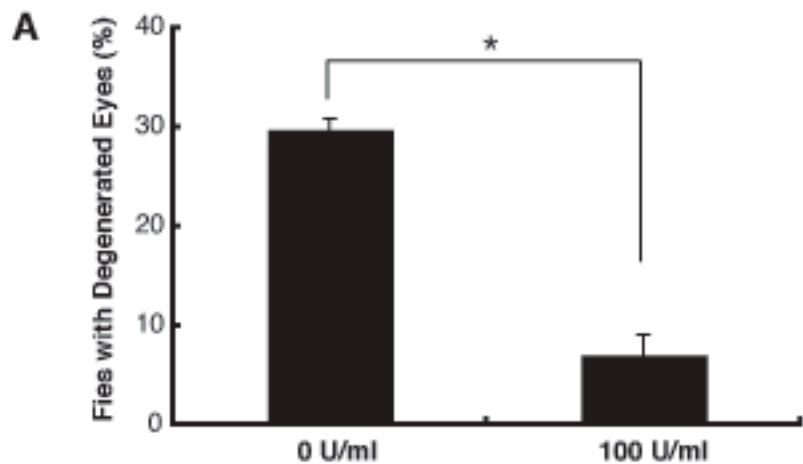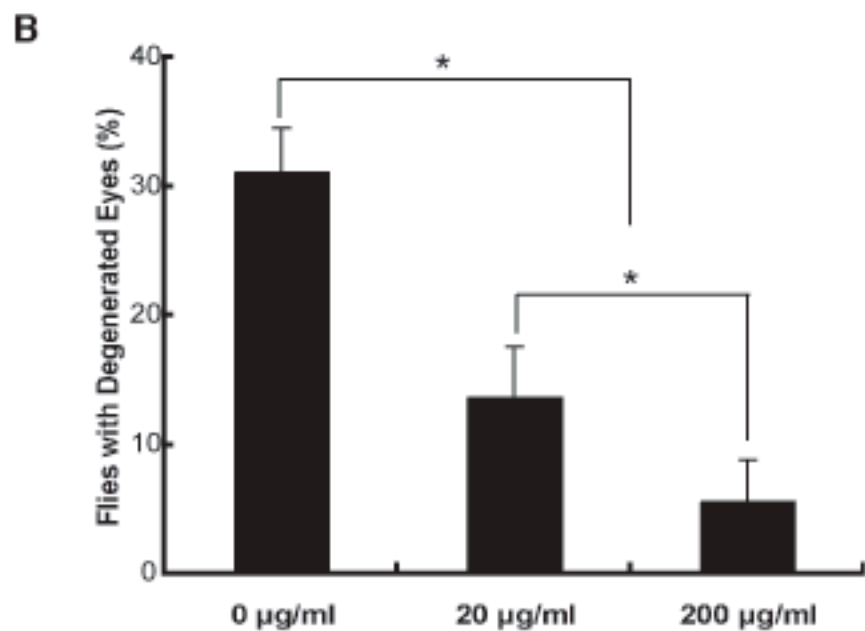

Supplement: pnas_0604661103_6.pdf [file pnas_0604661103_6.pdf]

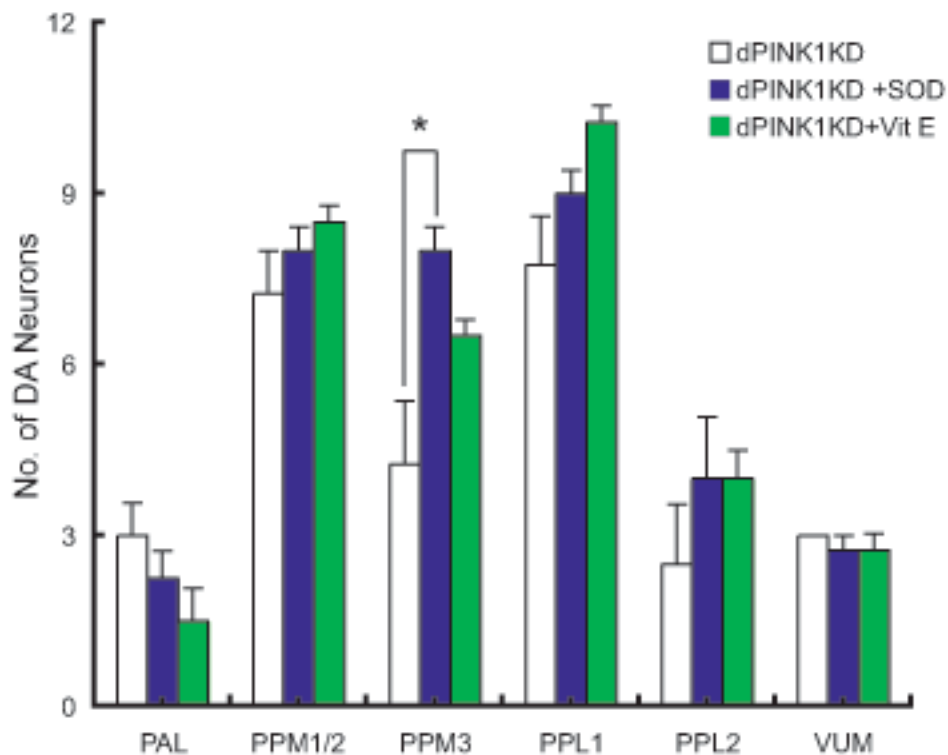

Supplement: pnas_0604661103_7.pdf [file pnas_0604661103_7.pdf]
